1 **Title**

2 **Immediate reuse of patch-clamp pipettes after ultrasonic cleaning**

3

4 **Authors**

5 Kevin Jehasse<sup>1,\*</sup>, Sophie Wetz<sup>1,3</sup>, Peter Neumann-Raizel<sup>4#</sup>, Björn M. Kampa<sup>1,2,3,#,\*</sup>

6

7 **Affiliation**

8 <sup>1</sup>Systems Neurophysiology, Institute of Biology II, RWTH-Aachen University, Aachen,  
9 Germany

10 <sup>2</sup>JARA BRAIN, Institute of Neuroscience and Medicine (INM-10), Forschungszentrum  
11 Jülich, Germany

12 <sup>3</sup>Research Training Group 2610 InnoRetVision, RWTH-Aachen University, Aachen,  
13 Germany

14 <sup>4</sup>Luigs & Neumann GmbH, Ratingen, Germany

15 \*Correspondence: Kevin Jehasse: [jehasse@bio2.rwth-aachen.de](mailto:jehasse@bio2.rwth-aachen.de); Björn M. Kampa:  
16 [kampa@brain.rwth-aachen.de](mailto:kampa@brain.rwth-aachen.de)

17 # equal contribution

18

19 **Abstract**

20 The patch-clamp technique has revolutionized neurophysiology by allowing to study  
21 single neuronal excitability, synaptic connectivity, morphology, and the transcriptomic  
22 profile. However, the throughput in recordings is limited because of the manual  
23 replacement of patch-pipettes after each attempt often also being unsuccessful. This  
24 has been overcome by automated cleaning the tips in detergent solutions, allowing to  
25 reuse the pipette for further recordings. Here, we developed a novel method of  
26 automated cleaning by sonicating the tips within the bath solution wherein the cells are  
27 placed, reducing the risk of contaminating the bath solution or internal solution of the  
28 recording pipette by any detergent and avoiding the necessity of a separate chamber  
29 for cleaning. We showed that the patch-pipettes can be used consecutively at least 10  
30 times and that the cleaning process does not negatively impact neither the brain slices

31 nor other patched neurons. This method, combined with automated patch-clamp,  
32 highly improves the throughput for single and especially multiple recordings.

33

## 34 **Introduction**

35 Patch-clamp recording is a widely-use and powerful technique to study single-cell  
36 electrophysiology, especially in neuroscience. It led to the characterization of several  
37 aspects of neuronal physiology, *in vitro* and *in vivo*, such as ion channel activity  
38 underlying action potential [1,2], intrinsic excitability [3,4], synaptic integration [5,6]  
39 plasticity [7] and network activity [8,9]. Patch-clamp also allows to record in the different  
40 compartments of neurons [10–12] including very distant dendritic branches or axonal  
41 sections. In the *whole-cell* configuration, it is possible to dialyze cells with fluorescent  
42 dyes for morphological reconstructions and to collect the cytoplasm to analyze single-  
43 cell transcriptomic profiles [13,14]. Although the patch-clamp technique is well suited to  
44 characterize the heterogeneity of neurons in the brain, it is highly laborious and time-  
45 consuming with variable success rates resulting in a low-throughput. To overcome this  
46 issue, engineering advancements managed to automate patch-clamp *in vitro* and *in*  
47 *vivo* [15–17]. When automated, the software is able to track the patch pipette and  
48 individual neuron positions in order to approach and record them. While it reduces the  
49 human interaction for the recording, it is still required to manually change the patch  
50 pipette after each attempt.

51 To obtain a successful recording, one crucial parameter is to have a perfectly clean  
52 patch-clamp pipette tip filled with a filtered internal solution [18]. In this condition, there  
53 is a high chance to form a seal of high-resistance ( $\geq 1 \text{ G}\Omega$ , which is called “gigaseal”)  
54 with the membrane of the neuron. After each successful or failed attempt, the used  
55 pipette has to be manually changed. Therefore, the human factor can be a big issue

56 when it comes to multiple recordings because of vibrations from the exchange that can  
57 affect the seal of other pipettes attached to neurons in the context of neuronal network  
58 characterization. It can also be an issue for *in vivo* patch-clamp studies as the manual  
59 pipette replacement could disrupt the animal and the following recordings. To prevent  
60 that, an automated method for cleaning patch pipettes has recently been developed  
61 [19]. This approach consists of immersing the tip of used patch-clamp pipettes in a  
62 separate chamber containing the detergent Alconox while applying cycles of positive  
63 pressure and negative pressure to the pipette tip. Coupled with automated patch-clamp  
64 [20], the throughput of patch-clamp recording is significantly increased. However, the  
65 necessity of a separate bath cleaning chamber and the risk of contaminating the  
66 recording bath solution nor pipette internal solution with detergent reducing the  
67 usability of this cleaning method.

68 Since patch-clamp pipettes are made of borosilicate glass and can also be cleaned by  
69 sonification, we developed a novel cleaning system based on that method preventing  
70 the use of detergent. The sonification is performed by a piezo-element mounted on the  
71 recording headstage and connected to a pressure control system (Fig.1a). The  
72 ultrasonic cleaning is performed in artificial cerebrospinal fluid (aCSF) and allows to  
73 reuse the same patch-clamp pipette at least 10 times without affecting the recording  
74 quality. We also showed that the cleaning procedure within the same bath does not  
75 affect the stability of seal of other patch-clamp pipettes with their respective neurons.  
76 Therefore, ultrasonic cleaning is a powerful improvement offering significant  
77 advantages in particular for multiple simultaneous patch-clamp recordings.

78

## 79 **Methods**

### 80 *Cleaning procedure*

81 We used a now commercially-available pressure control system (LN-PCS, Luigs &  
82 Neumann, Germany) to deliver positive and negative pressure to the patch-pipette.  
83 The procedure is set and triggered with a SM10 Remote Control Touch (Luigs &  
84 Neumann, Germany). The cleaning protocol consisted of 6 steps alternating positive  
85 (+500 mBar for 3s) and negative pressures (-300 mBar for 3s) and the frequency of  
86 sonification is set at 40 kHz. Different pressures or frequencies can be used. A safe  
87 cleaning distance (> 5 mm from the brain slice) was defined before the beginning of  
88 the experiment to prevent any energy transfer from the pipette being cleaned to other  
89 pipettes attached to neurons in *whole-cell* configuration.

90

### 91 *Electrophysiology*

92 All procedures were performed with the approval of local authority (animal license  
93 50154A4, LANUV). Adult C57BL/6 mice of both sex were anesthetized with isoflurane  
94 (AbbVie, UK) and decapitated. 300  $\mu$ m-thick coronal slices were cut with a vibratome  
95 (Leica VT1200s) in an ice-cold modified cutting solution containing (in mM) : 125 NaCl,  
96 2.5 KCl, 1.25 NaH<sub>2</sub>PO<sub>4</sub>, 25 Glucose, 6 MgCl<sub>2</sub>, 1 CaCl<sub>2</sub>, pH 7.4 (95% O<sub>2</sub> / 5% CO<sub>2</sub> and  
97 310 mOsm/l). Slices were incubated for 30 min at 34°C in aCSF containing (in mM) :  
98 125 NaCl, 2.5 KCl, 1.25 NaH<sub>2</sub>PO<sub>4</sub>, 25 Glucose, 1 MgCl<sub>2</sub>, 2 CaCl<sub>2</sub>, pH 7.4 (95% O<sub>2</sub> / 5%  
99 CO<sub>2</sub> and ~310 mOsm/l) and recovered at room temperature.

100 Patch-clamp recording were performed using a LNscope (Luigs & Neumann,  
101 Germany) equipped with a 40x water immersion objective (Zeiss, Germany), infrared-  
102 Dodt gradient contrast and a CMOS camera (Chameleon USB 3.0 monochrome  
103 Camera, Point Grey, Canada). Patch pipettes (5-8 M $\Omega$ ) were pulled from borosilicate  
104 glass (GB150F-10, Scientific Products GmbH, Germany) with a horizontal puller (P-  
105 1000, Sutter Instruments, Novato, CA, USA). The internal solution contained (in mM):

106 100 K-gluconate, 20 KCl, 10 Hepes, 4 Mg-ATP, 0.3 Na-GTP, 10 Na<sub>2</sub>-phosphocreatine,  
107 0.3 % biocytine, pH 7.2 (~300 mosm/l). Data were acquired with an EPC-10 USB  
108 amplifier (Heka, Lambrecht, Germany) and Patchmaster Next software (Heka,  
109 Lambrecht, Germany). Data were digitized at 20 kHz and lowpass filtered at 10 kHz.  
110 Whole-cell patch-clamp recordings consisted of current steps from -100 pA to 300 pA  
111 in steps of 50 pA for 500 ms. Membrane resistance ( $R_m$ ) was monitored before and  
112 after the cleaning procedure of non-recording pipettes. The resting membrane potential  
113 (RMP) was monitored during the cleaning process to evaluate any impact of the  
114 sonification on the stability of recording. The resistance of the pipette ( $R_{pip}$ ), the  
115 resistance of gigaseal ( $R_{GS}$ ) and the access resistance ( $R_a$ ) were monitored in voltage-  
116 clamp mode to evaluate the efficiency of the cleaning procedure.

117

#### 118 *Data analysis*

119 Data were analyzed with Matlab (version 2022a) and appropriate statistical analysis  
120 were performed using GraphPad Prism 8. Representations in Fig. 1B and Fig. 3A were  
121 created with BioRender.com.

122

## 123 **Results**

### 124 *Cleaning efficiency*

125 Before approaching the patch-clamp pipette to the brain slice, a “cleaning position” (>  
126 5 mm from the slice) was defined to safely clean the pipette without affecting the  
127 sample. This is determined by the micromanipulator control panel. When “cleaning” is  
128 selected, the micromanipulator automatically goes to the saved XYZ coordinates (Fig.  
129 1B). The piezo mounted on the headstage performs the sonification of the patch-clamp  
130 pipettes by making it oscillate at 40 kHz. To help removing the membrane residue

131 inside the pipette, the sonification is coupled with a cycle of high positive and negative  
132 pressure similar to the protocol used for cleaning in detergent [19]. After the cleaning  
133 procedure the patch-clamp pipette can be placed into a “parking position” which  
134 correspond to a determined XYZ distance to its original place. This prevents any  
135 damage of the slice by the automatic replacement of the pipette and to freely move to  
136 find another neuron to record.

137 For each attempt,  $R_{\text{pip}}$  was monitored once a *whole-cell* recording attempt was made,  
138 and compared before and after the ultrasonic cleaning (Fig. 2A) to assess the efficiency  
139 of the procedure. As expected,  $R_{\text{pip}}$  was reduced after sonification (before:  $11.08 \pm 0.22$   
140  $\text{M}\Omega$ ; after:  $3.98 \pm 0.05 \text{M}\Omega$ ,  $n = 55$  attempts,  $p < 0.0001$ , Wilcoxon signed-rank test).  
141 Over ten cleaning cycles,  $R_{\text{pip}}$  remained constant ( $p = 0.0625$  for fresh vs tenth cycle,  
142  $n = 5$ , Wilcoxon signed-rank test; Fig. 2B). These data show that ultrasonic cleaning  
143 coupled with alternating high and low pressure can successfully remove remaining  
144 membrane residues and repeatedly over at least ten attempts.

145 Next, we evaluated the quality of recordings by monitoring  $R_{\text{GS}}$  and  $R_{\text{a}}$ .  $R_{\text{GS}}$  was  
146 obtained before breaking in *whole-cell*, when the value was steady. We managed to  
147 patch 55 neurons with 5 pipettes that were cleaned 10 times and we observed no effect  
148 of ultrasonic cleaning on  $R_{\text{GS}}$  ( $p = 0.89$ , Friedman test; Fig. 2C) and  $R_{\text{a}}$  ( $p = 0.6217$ ,  
149 Friedman test; Fig. 2D). These results show that with the novel sonification method  
150 patch-clamp pipettes can be reused at least 10 times for successful *whole-cell*  
151 recordings.

152

### 153 *Effect of sonification on cell survival*

154 We next tested whether ultrasonic cleaning could affect neuronal survival within the  
155 same chamber. In the context of simultaneous paired recordings, it is crucial that

156 cleaning one pipette tip does not affect other neurons maintained in *whole-cell* by the  
157 patch-clamp pipettes. As mentioned above, the pipette is put at a safe distance (>5  
158 mm) from the sample to prevent any harm or energy transfer to the other pipettes. In  
159 this condition, RMP of neurons being recorded simultaneously remained stable during  
160 the cleaning process (before:  $-65.0 \pm 1.8$  mV; after:  $-65.1 \pm 1.9$  mV,  $n = 5$ ,  $p = 0.5625$ ,  
161 Wilcoxon signed-rank test; Fig. 3A, B) and  $R_m$  is not affected (before:  $110.3 \pm 9.3$  M $\Omega$ ;  
162 after:  $109.7 \pm 7.7$  M $\Omega$ ,  $n = 5$ ,  $p > 0.99$ , Wilcoxon signed-rank test; Fig. 3A, C). In one  
163 example case, we successfully recorded the same neuron 3 times with the same patch-  
164 clamp pipette after being cleaned and filled it with biocytin for confirmation (Fig. 3D,  
165 E). Its intrinsic parameters remained stable for the all 3 attempts. And the post-hoc  
166 reconstructed morphology did not show any sign of neuronal damage (Fig. 3E).  
167 Altogether, these data show that ultrasonic patch-clamp pipette cleaning does not  
168 harm neurons situated within the same bath chamber.

169

## 170 **Discussion**

171 The patch-clamp technique is a very powerful method but it is laborious and the  
172 success rate is not high. In order to increase its throughput, automatization of the  
173 patch-clamp technique has recently been the focus of engineering. While there have  
174 been several successful developments to automatize the whole procedure [15,17,20],  
175 it is crucial to overcome the changing of patch-clamp pipette. Others have shown that  
176 it is possible to clean the tips using either bleach [21] or detergent combined with  
177 automated pressure control [19,22]. However, even if not detected, there might be  
178 some trace left of these chemicals inside the patch-clamp pipette that can be harmful  
179 for the cells. We developed an ultrasonic cleaning system coupled with automated

180 pressure control, which allows the tips to be cleaning in a physiological solution and is  
181 less likely to harm the cells.

182 Cleaning patch-clamp remains to this day one of, if not, the key element to make patch-  
183 clamp routine. In the context of drug discovery, automated patch-clamp experiments  
184 are a game changer to explore the pharmacology of ion channels. Although we did not  
185 investigate the effect of ultrasonic cleaning on ion channels, Kolb and colleagues  
186 showed that GABA receptors pharmacology is not affected with pipettes being cleaned  
187 in Alconox [19]. With these observations combined with ours, showing that ultrasonic  
188 cleaning does not affect neuronal excitability, it is highly possible that our method is  
189 not affecting ion channels pharmacology.

190 Regarding the longevity of pipettes, we did not investigate how many times pipettes  
191 can be used before replacing it with a fresh one. Kolb and colleagues showed that it is  
192 not possible to reuse the same pipette indefinitely [19]. We suspect that our approach  
193 will allow reusing the same pipettes for a limited time, as internal solution contains  
194 chemicals that degrade when not refrigerated (e.g. ATP, GTP).

195 By being able to clean the pipette tip in aCSF, our method offers the possibility to avoid  
196 using a second compartment. This is convenient, especially for *in vivo* patch-clamp, as  
197 it would allow clean the pipette above the cortex and reduce the time spent to change  
198 it after each attempt. Coupled with recently automated *in vivo* patch-clamp recording  
199 [15], it will increase the throughput of that method and make it more accessible.

200 In conclusion, we developed a detergent free cleaning method for patch-clamp pipettes  
201 based on sonification coupled with a pressure control system that can be implemented  
202 to automated patch-clamp systems.

203

204 **Acknowledgments**



205 This work was funded by the Deutsche Forschungsgemeinschaft (DFG, German  
206 Research Foundation) - GRK2610 and by Luigs & Neumann GmbH.

207

## 208 **References**

- 209 1. Bezanilla F, Rojas E, Taylor RE. Sodium and potassium conductance during a  
210 membrane action potential. *Journal of Physiology*. 1970;211: 729–751.  
211 doi:10.1113/jphysiol.1970.sp009301
- 212 2. de Hass V, Vogel W. Sodium and potassium currents recorded during an action  
213 potential. *European Biophysics Journal* 1989 17:1. 1989;17: 49–51.  
214 doi:10.1007/BF00257145
- 215 3. Spruston N, Johnston D. Perforated patch-clamp analysis of the passive  
216 membrane properties of three classes of hippocampal neurons. *J Neurophysiol*.  
217 1992;67: 508–529. doi:10.1152/JN.1992.67.3.508
- 218 4. Petersen CCH. Whole-Cell Recording of Neuronal Membrane Potential during  
219 Behavior. *Neuron*. 2017;95: 1266–1281. doi:10.1016/J.NEURON.2017.06.049
- 220 5. Chen X, Leischner U, Rochefort NL, Nelken I, Konnerth A. Functional mapping  
221 of single spines in cortical neurons in vivo. *Nature*. 2011;475: 501–505.  
222 doi:10.1038/nature10193
- 223 6. Edwards FA, Konnerth A, Sakmann B. Quantal analysis of inhibitory synaptic  
224 transmission in the dentate gyrus of rat hippocampal slices: a patch-clamp study.  
225 *Journal of Physiology*. 1990;430: 213–249.  
226 doi:10.1113/JPHYSIOL.1990.SP018289
- 227 7. Bi GQ, Poo MM. Synaptic Modifications in Cultured Hippocampal Neurons:  
228 Dependence on Spike Timing, Synaptic Strength, and Postsynaptic Cell Type.

- 229 Journal of Neuroscience. 1998;18: 10464–10472. doi:10.1523/JNEUROSCI.18-  
230 24-10464.1998
- 231 8. Kampa BM, Letzkus JJ, Stuart GJ. Cortical feed-forward networks for binding  
232 different streams of sensory information. *Nat Neurosci.* 2006;9: 1472–1473.  
233 doi:10.1038/nn1798
- 234 9. Taof C, Zhangf G, Xiong Y, Zhou Y. Functional dissection of synaptic circuits: in  
235 vivo patch-clamp recording in neuroscience. *Front Neural Circuits.* 2015;9.  
236 doi:10.3389/FNCIR.2015.00023
- 237 10. Stuart GJ, Sakmann B. Active propagation of somatic action potentials into  
238 neocortical pyramidal cell dendrites. *Nature.* 1994;367: 69–72.  
239 doi:10.1038/367069a0
- 240 11. Shu Y, Hasenstaub A, Duque A, Yu Y, McCormick DA. Modulation of intracortical  
241 synaptic potentials by presynaptic somatic membrane potential. *Nature.*  
242 2006;441: 761–765. doi:10.1038/nature04720
- 243 12. Seutin V, Engel D. Differences in Na<sup>+</sup> conductance density and Na<sup>+</sup> channel  
244 functional properties between dopamine and GABA neurons of the rat substantia  
245 nigra. *J Neurophysiol.* 2010;103: 3099–3114. doi:10.1152/JN.00513.2009
- 246 13. Lee BR, Budzillo A, Hadley K, Miller JA, Jarsky T, Baker K, et al. Scaled, high  
247 fidelity electrophysiological, morphological, and transcriptomic cell  
248 characterization. *Elife.* 2021;10. doi:10.7554/ELIFE.65482
- 249 14. Cadwell CR, Palasantza A, Jiang X, Berens P, Deng Q, Yilmaz M, et al.  
250 Electrophysiological, transcriptomic and morphologic profiling of single neurons  
251 using Patch-seq. *Nat Biotechnol.* 2016;34: 199–203. doi:10.1038/NBT.3445

- 252 15. Li L, Ouellette B, Stoy WA, Garren EJ, Daigle TL, Forest CR, et al. A robot for  
253 high yield electrophysiology and morphology of single neurons in vivo. *Nat*  
254 *Commun.* 2017;8: 1–10. doi:10.1038/ncomms15604
- 255 16. Wang G, Wyskiel DR, Yang W, Wang Y, Milbern LC, Lalanne T, et al. An  
256 optogenetics- and imaging-assisted simultaneous multiple patch-clamp  
257 recording system for decoding complex neural circuits. *Nat Protoc.* 2015;10:  
258 397–412. doi:10.1038/nprot.2015.019
- 259 17. Koos K, Oláh G, Balassa T, Mihut N, Rózsa M, Ozsvár A, et al. Automatic deep  
260 learning-driven label-free image-guided patch clamp system. *Nat Commun.*  
261 2021;12: 1–11. doi:10.1038/s41467-021-21291-4
- 262 18. Neher E. Ion channels for communication between and within cells. *Neuron.*  
263 1992;8: 605–612. doi:10.1016/0896-6273(92)90083-P
- 264 19. Kolb I, Stoy WA, Rousseau EB, Moody OA, Jenkins A, Forest CR. Cleaning  
265 patch-clamp pipettes for immediate reuse. *Sci Rep.* 2016;6: 1–10.  
266 doi:10.1038/srep35001
- 267 20. Kolb I, Landry CR, Yip MC, Lewallen CF, Stoy WA, Lee J, et al. PatcherBot: a  
268 single-cell electrophysiology robot for adherent cells and brain slices. *J Neural*  
269 *Eng.* 2019;16: 046003. doi:10.1088/1741-2552/AB1834
- 270 21. Kao L, Abuladze N, Shao XM, McKeegan K, Kurtz I. A new technique for multiple  
271 re-use of planar patch clamp chips. *J Neurosci Methods.* 2012;208: 205–210.  
272 doi:10.1016/J.JNEUMETH.2012.05.002
- 273 22. Peng Y, Mittermaier FX, Planert H, Schneider UC, Alle H, Geiger JRP. High-  
274 throughput microcircuit analysis of individual human brains through next-  
275 generation multineuron patch-clamp. *Elife.* 2019;8. doi:10.7554/eLife.48178
- 276

277 Figure legend

278

A

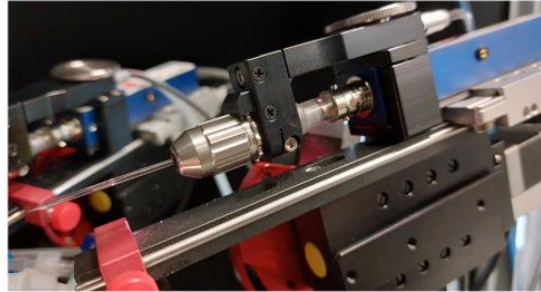

B

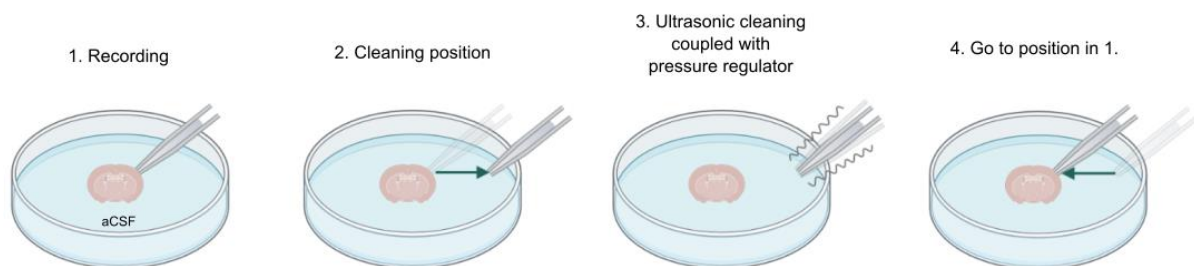

279

280 **Figure 1: Ultrasonic cleaning is performed by a piezo coupled to a pressure**

281 **regulator. (A)** Picture of the headstage unit. This unit is connected to a pressure

282 regulator to allow the cleaning. **(B)** When the recording is finished (1), the cleaning

283 sequence can be launched. The manipulator put the tip to a pre-defined cleaning

284 position (2) where the sonification coupled with cycle of high positive and negative

285 pressure can occur (3). Once the procedure is finished, the manipulator put the tip back

286 to its initial parking position (4) before the cleaning was launched.

287

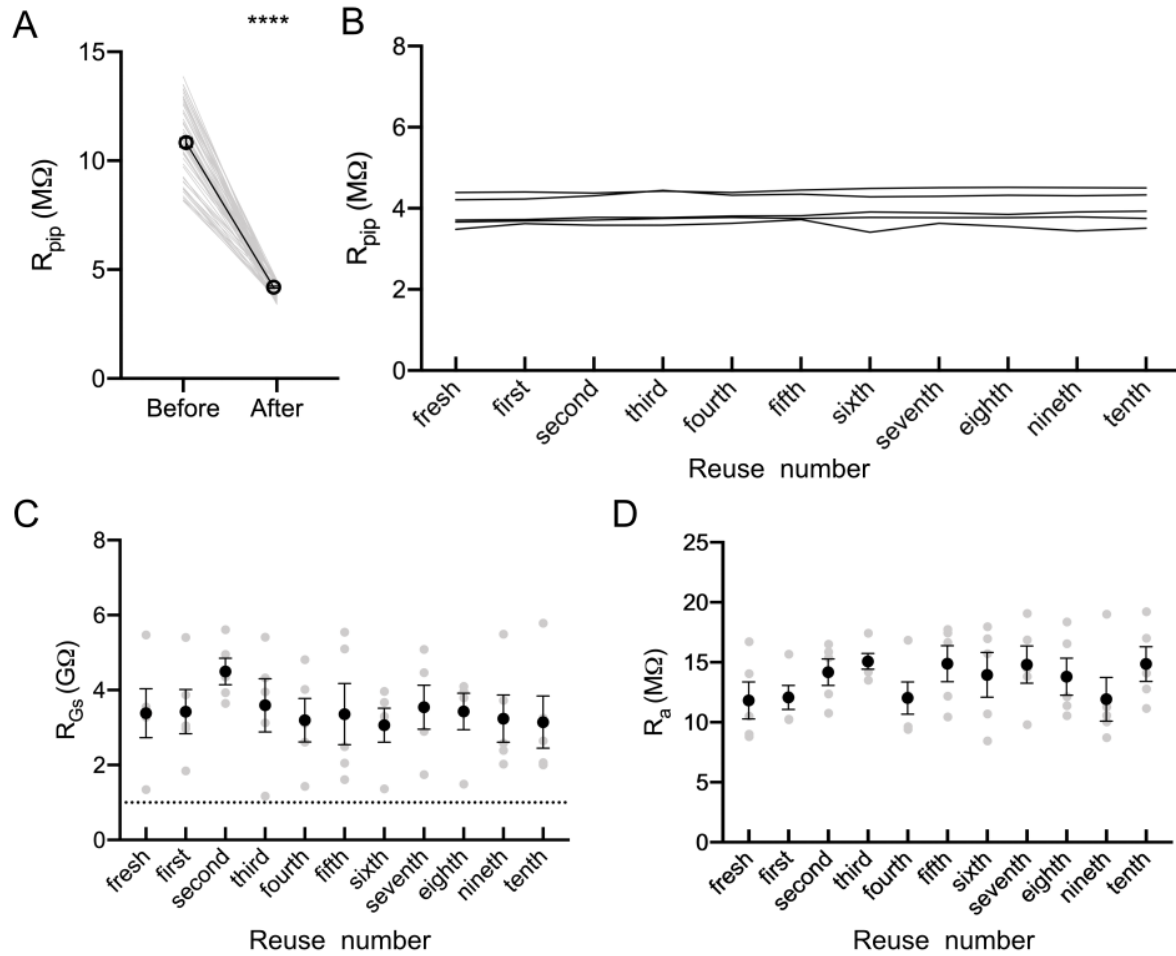

288

289 **Figure 2: Ultrasonic cleaning allows reusing pipettes for multiple consecutive**

290 **recordings. (A) and (B) indicate that ultrasonic cleaning can clean the tip as  $R_{pip}$  is**

291 **recovered after each cycle. (C) shows that patch-clamp pipette can be successfully**

292 **reused at least ten times and  $R_{Gs}$  is successfully reached. (D) show that  $R_a$  remains**

293 **unaffected after each cleaning cycle, indicating that the tip is cleaned and the pipette**

294 **can be reused for successful patch-clamp recordings.**

295

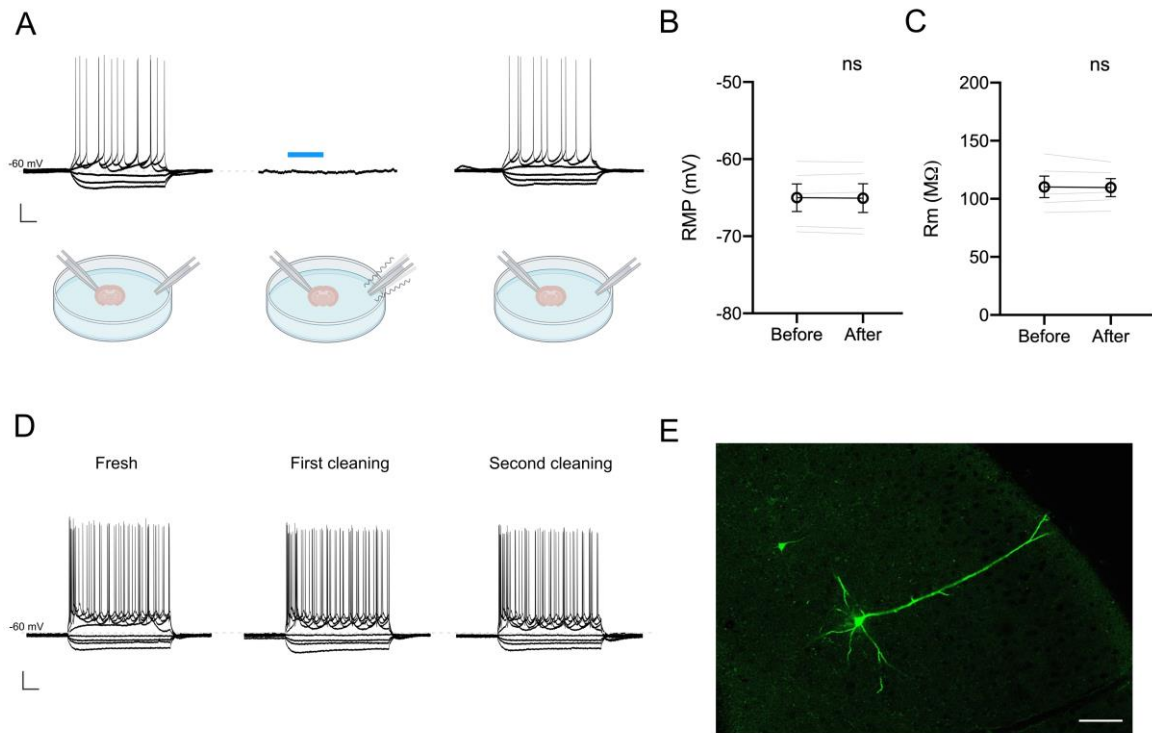

296

297 **Figure 3: Ultrasonic cleaning is not harmful for neurons.** (A) Example of a neuron  
298 being recorded before (left), during (middle) and after (right) ultrasonic cleaning of a  
299 patch-clamp pipette inside the same recording chamber. Scale bar is  $y = 20$  mV (all  
300 panels) and  $x = 100$  ms (left and right) and 20 s (middle). Blue bar corresponds to the  
301 moment when the non-recording tip is being cleaned. (B) and (C) show that the  
302 cleaning procedure does not interfere with simultaneous patch-clamp recordings as  
303 RMP and  $R_m$  of the recorded neurons remain unaffected. (D) Example a neuron being  
304 successfully recorded three consecutive times with the patch-clamp pipette after  
305 ultrasonic cleaning. Scale bar is  $y = 20$  mV and  $x = 100$  ms. (E) *Post-hoc* staining of  
306 neuron from (D). Scale bar is  $x = 80$   $\mu$ m.
